# Supplementary material for: Large magnetic entropy change at cryogenic temperature in rare earth HoN nanoparticles
Source: Royal Society of Chemistry journal article supplement (doi:10.1039/c6ra16356d), 2016-01-01
Supplement: c6ra16356d1.pdf [file c6ra16356d1.pdf]

## Supporting information

# Large magnetic entropy change at cryogenic temperature in rare earth HoN nanoparticles

K.P. Shinde<sup>1</sup>, S.H. Jang<sup>1</sup>, M. Ranot<sup>2</sup>, B.B. Sinha<sup>3</sup>, J.W. Kim<sup>1</sup>, and K.C. Chung<sup>1,\*</sup>

<sup>1</sup>Powder & Ceramics Division, Korea Institute of Materials Science, Changwon, 51508, Republic of Korea

<sup>2</sup>Materials Deformation Department, Korea Institute of Materials Science, Changwon, 51508, Republic of Korea

<sup>3</sup>Centre of Nanoscience and Nanotechnology, University of Mumbai University, Mumbai, 400098, India

\*Corresponding author email: kcchung@kims.re.kr

## Figures

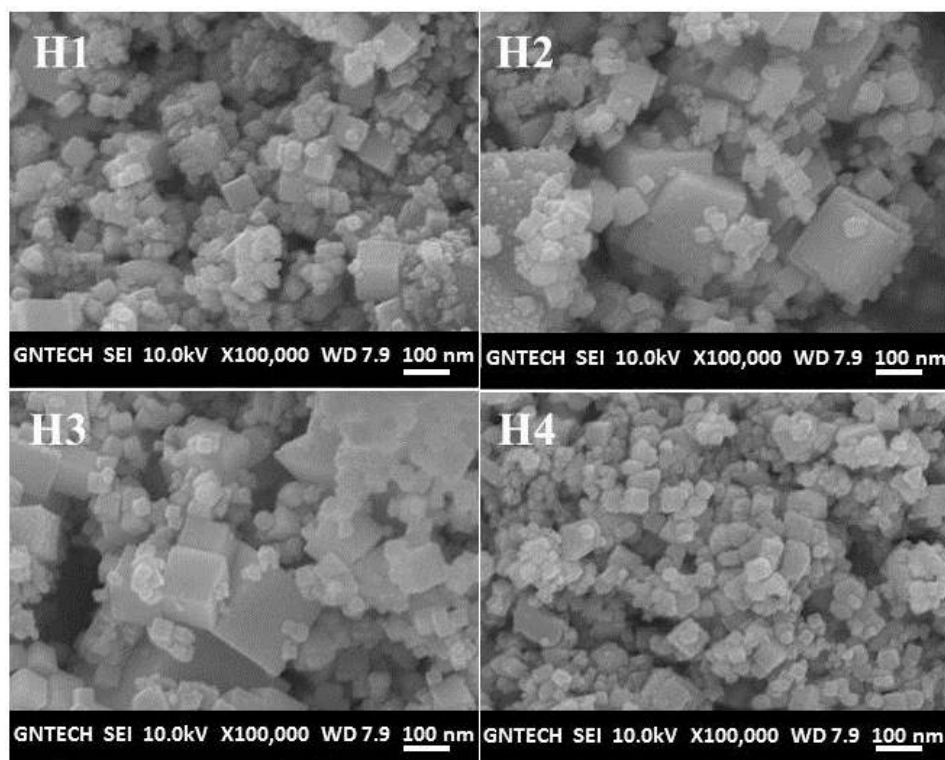

**Figure S1:** FESEM images of HoN samples (a) H1 (b) H2 (c) H3 and (d) H4.

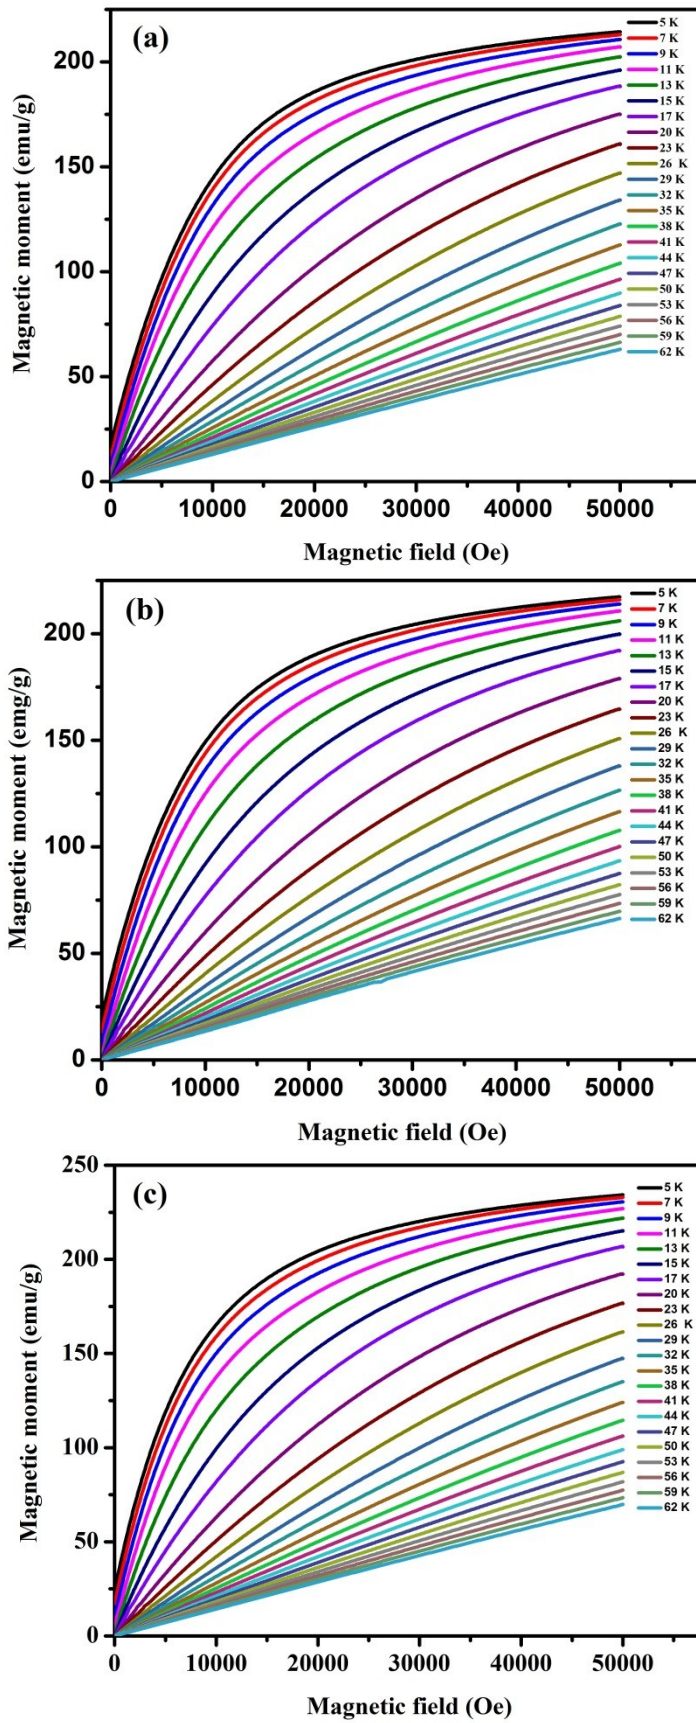

**Figure S2:** Isothermal magnetization isotherms (M-H) measured at different temperatures around  $T_C$  in the magnetic field of 0-5 T for HoN samples (a) H2 (b) H3 and (c) H4.

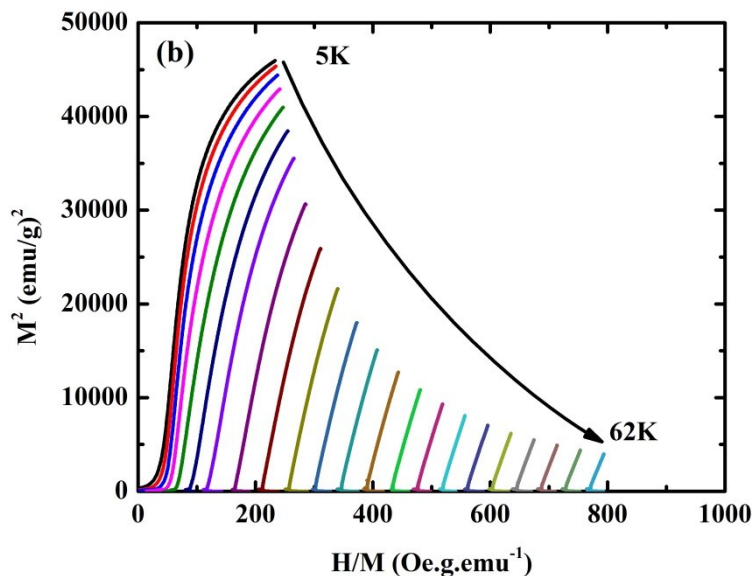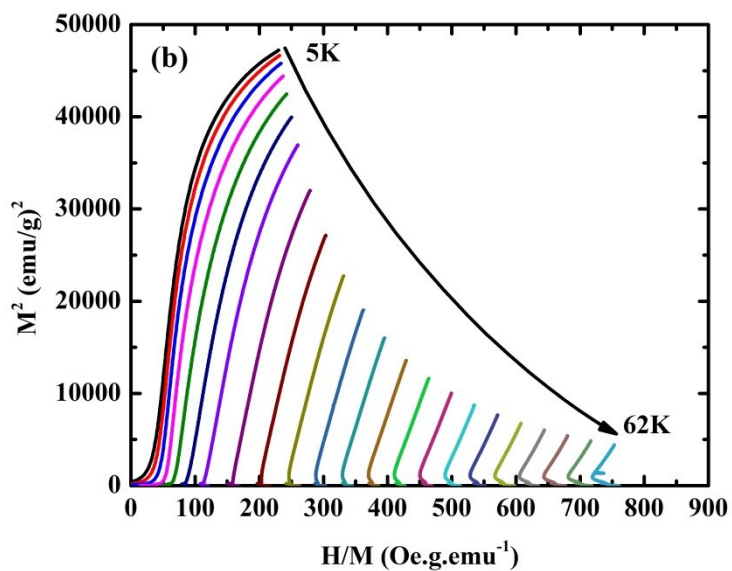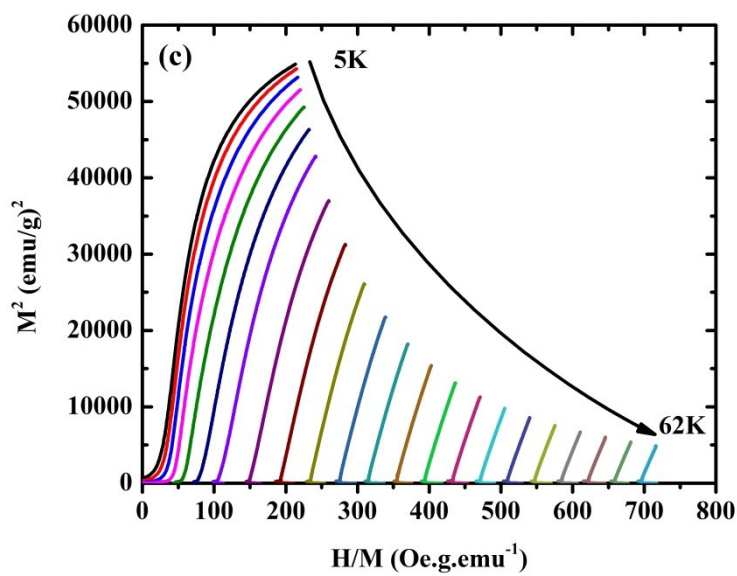

**Figure S3:** A set of typical  $M^2$  vs  $H/M$  curves obtained for HoN samples (a) H2 (b) H3 and (c) H4.
